# Supplementary material for: Generative adversarial networks (GAN) based efficient sampling of chemical composition space for inverse design of inorganic materials
Source: Springer Nature journal article supplement (doi:10.1038/s41524-020-00352-0), 2020-06-26
Supplement: 41524_2020_352_MOESM1_ESM.pdf [file 41524_2020_352_MOESM1_ESM.pdf]

## Supplementary Information

### Generative adversarial networks (GAN) based efficient sampling of chemical composition space for inverse design of inorganic materials

#### Supplementary Figures

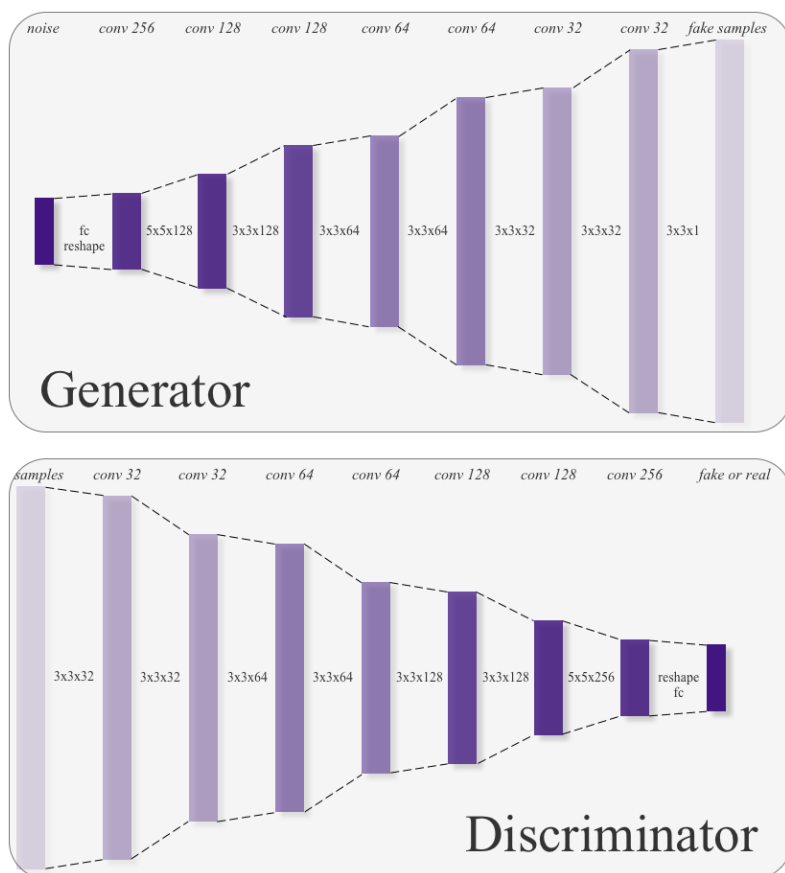

Supplementary Figure 1| Detailed architecture of the generator and discriminator in MatGAN model

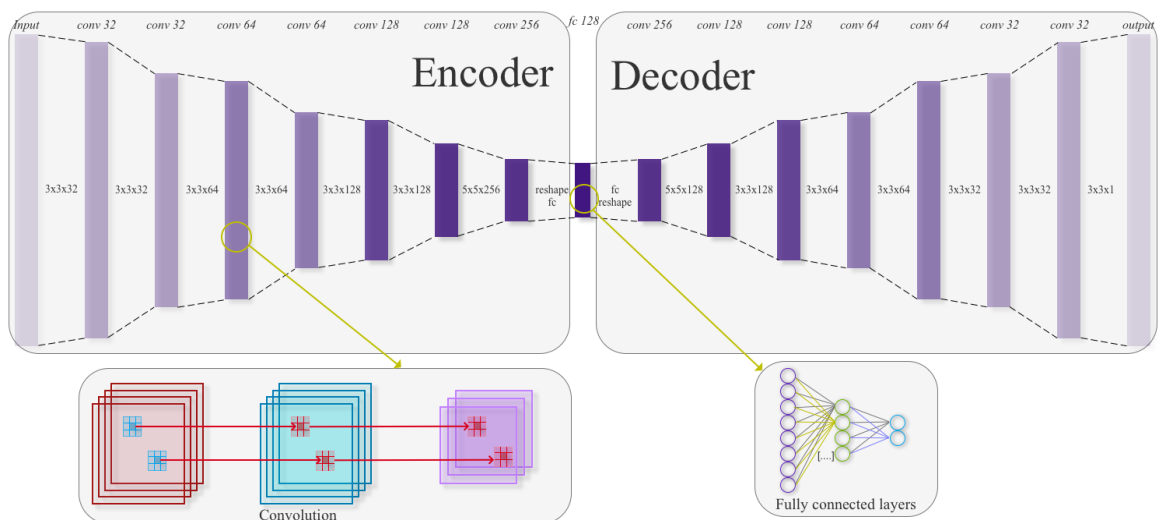

**Supplementary Figure 2 | Detailed architecture of the autoencoder model**

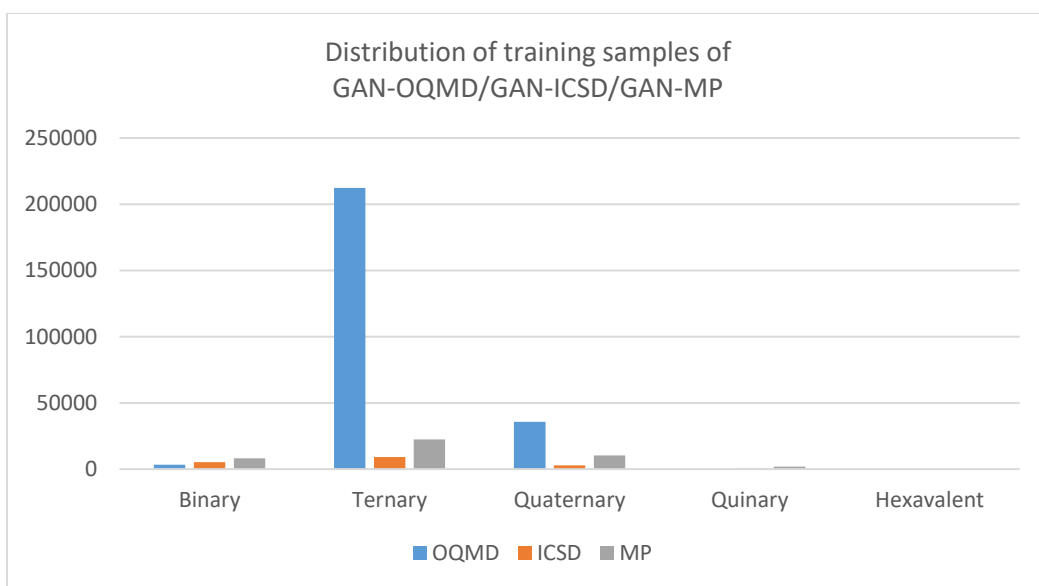

**Supplementary Figure 3 | Comparison of the distributions of training samples of three GANs. The OQMD is strongly biased with a large percentage of ternary compounds.**

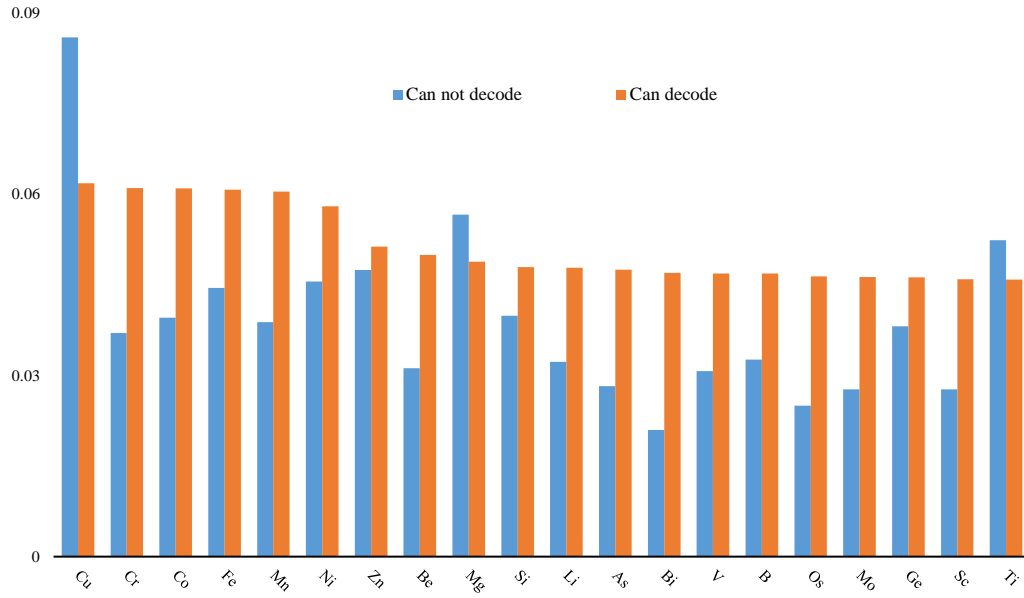

**Supplementary Figure 4| Comparison of enriched element distribution of decodable and non-decodable materials.**

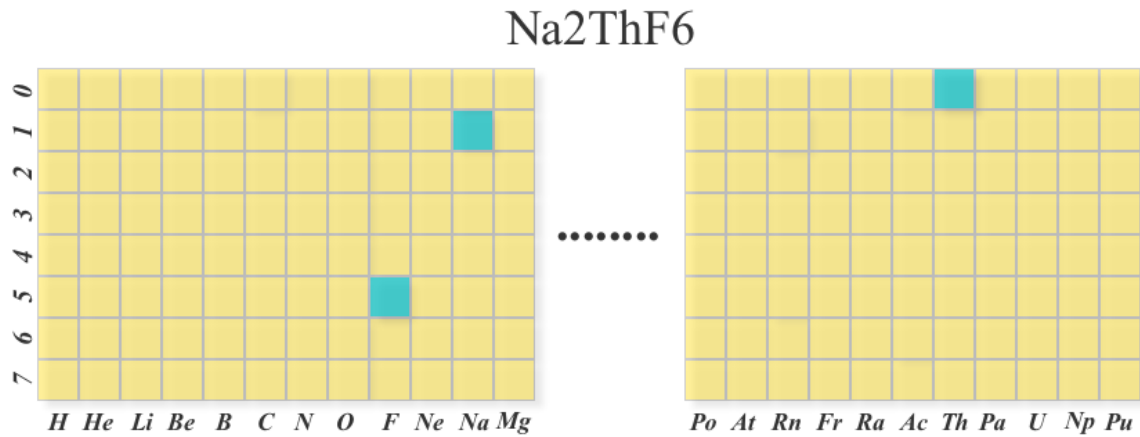

**Supplementary Figure 5| One-hot encoding of materials for effective convolutional neural network learning**

## Supplementary Tables

Supplementary Table 1. | Parameters of GAN-OQMD generator

| Model         | Layer              | Input Shape         | Filter     | Kernel      | Stride |
|---------------|--------------------|---------------------|------------|-------------|--------|
| Generator     | Fc1                | [batch, 128]        | -          | -           | -      |
|               | Reshape            | [batch, 6×4×256]    | -          | -           | -      |
|               | DeConv1            | [batch, 6, 4, 256]  | 128        | (5, 5, 256) | (2, 2) |
|               | DeConv2            | [batch, 11, 8, 128] | 128        | (3, 3, 128) | (2, 1) |
|               | DeConv3            | [batch, 22, 8, 128] | 64         | (3, 3, 128) | (1, 1) |
|               | DeConv4            | [batch, 22, 8, 64]  | 64         | (3, 3, 64)  | (2, 1) |
|               | DeConv5            | [batch, 43, 8, 64]  | 32         | (3, 3, 64)  | (1, 1) |
|               | DeConv6            | [batch, 43, 8, 32]  | 32         | (3, 3, 32)  | (2, 1) |
| DeConv7       | [batch, 85, 8, 32] | 1                   | (3, 3, 32) | (1, 1)      |        |
| Discriminator | Conv1              | [batch, 85, 8, 1]   | 32         | (3, 3, 1)   | (1, 1) |
|               | Conv2              | [batch, 85, 8, 32]  | 32         | (3, 3, 32)  | (2, 1) |
|               | Conv3              | [batch, 43, 8, 32]  | 64         | (3, 3, 32)  | (1, 1) |
|               | Conv4              | [batch, 43, 8, 64]  | 64         | (3, 3, 64)  | (2, 1) |
|               | Conv5              | [batch, 22, 8, 64]  | 128        | (3, 3, 64)  | (1, 1) |
|               | Conv6              | [batch, 22, 8, 128] | 128        | (3, 3, 128) | (2, 1) |
|               | Conv7              | [batch, 11, 8, 128] | 256        | (5, 5, 128) | (2, 2) |
|               | Reshape            | [batch, 6, 4, 256]  | -          | -           | -      |
|               | Fc1                | [batch, 6×4×256]    | -          | -           | -      |

Parameters of GAN-ICSD and GAN-MP generators

| Model         | Layer   | Input Shape        | Filter | Kernel      | Stride |
|---------------|---------|--------------------|--------|-------------|--------|
| Generator     | Fc1     | [batch, 128]       | -      | -           | -      |
|               | Reshape | [batch, 6×4×128]   | -      | -           | -      |
|               | DeConv1 | [batch, 6, 4, 128] | 64     | (5, 5, 128) | (2, 2) |
|               | DeConv2 | [batch, 11, 8, 64] | 32     | (3, 3, 64)  | (2, 1) |
|               | DeConv3 | [batch, 22, 8, 32] | 16     | (3, 3, 32)  | (2, 1) |
|               | DeConv4 | [batch, 43, 8, 16] | 1      | (3, 3, 16)  | (2, 1) |
| Discriminator | Conv1   | [batch, 85, 8, 1]  | 16     | (3, 3, 1)   | (2, 1) |
|               | Conv2   | [batch, 43, 8, 16] | 32     | (3, 3, 16)  | (2, 1) |
|               | Conv3   | [batch, 22, 8, 32] | 64     | (3, 3, 32)  | (2, 1) |
|               | Conv4   | [batch, 11, 8, 64] | 128    | (5, 5, 64)  | (2, 2) |
|               | Reshape | [batch, 6, 4, 128] | -      | -           | -      |
|               | Fc1     | [batch, 6×4×128]   | -      | -           | -      |

**Supplementary Table 2| Parameters of Autoencoder**

| Model   | Layer   | Input Shape         | Filter | Kernel      | Stride |
|---------|---------|---------------------|--------|-------------|--------|
| Encoder | Conv1   | [batch, 85, 8, 1]   | 32     | (3, 3, 1)   | (1, 1) |
|         | Conv2   | [batch, 85, 8, 32]  | 32     | (3, 3, 32)  | (2, 1) |
|         | Conv3   | [batch, 43, 8, 32]  | 64     | (3, 3, 32)  | (1, 1) |
|         | Conv4   | [batch, 43, 8, 64]  | 64     | (3, 3, 64)  | (2, 1) |
|         | Conv5   | [batch, 22, 8, 64]  | 128    | (3, 3, 64)  | (1, 1) |
|         | Conv6   | [batch, 22, 8, 128] | 128    | (3, 3, 128) | (2, 1) |
|         | Conv7   | [batch, 11, 8, 128] | 256    | (5, 5, 128) | (2, 2) |
|         | Reshape | [batch, 5, 4, 256]  | -      | -           | -      |
|         | Fc1     | [batch, 5×4×256]    | -      | -           | -      |
| Decoder | Fc1     | [batch, 128]        | -      | -           | -      |
|         | Reshape | [batch, 5×4×256]    | -      | -           | -      |
|         | DeConv1 | [batch, 5, 4, 256]  | 128    | (5, 5, 256) | (2, 2) |
|         | DeConv2 | [batch, 11, 8, 128] | 128    | (3, 3, 128) | (2, 1) |
|         | DeConv3 | [batch, 22, 8, 128] | 64     | (3, 3, 128) | (1, 1) |
|         | DeConv4 | [batch, 22, 8, 64]  | 64     | (3, 3, 64)  | (2, 1) |
|         | DeConv5 | [batch, 43, 8, 64]  | 32     | (3, 3, 64)  | (1, 1) |
|         | DeConv6 | [batch, 43, 8, 32]  | 32     | (3, 3, 32)  | (2, 1) |
|         | DeConv7 | [batch, 85, 8, 32]  | 1      | (3, 3, 32)  | (1, 1) |

**Supplementary Table 3 | Distribution of training/validation/generated samples and the recovery rates in terms of element number of three GANs: GAN-OQMD, GAN-ICSD and GAN-MP**

| GAN-OQMD   | Training recovery % | Leave out recovery % | New rate % | Training sample number | Leave out sample number | Generated sample number |
|------------|---------------------|----------------------|------------|------------------------|-------------------------|-------------------------|
| Binary     | 95.27%              | 95.73%               | 73.32%     | 3364                   | 398                     | 12012                   |
| Ternary    | 55.03%              | 54.90%               | 44.98%     | 212245                 | 23606                   | 212289                  |
| Quaternary | 36.54%              | 36.69%               | 98.23%     | 35759                  | 3925                    | 741905                  |
| Quinary    | 0.00%               | 0.00%                | 100.00%    | 0                      | 0                       | 12012                   |
| Hexavalent | 0.00%               | 0.00%                | 100.00%    | 0                      | 0                       | 212289                  |
| Seven      | 0.00%               | 0.00%                | 100.00%    | 0                      | 0                       | 741905                  |
| Octavalent | 0.00%               | 0.00%                | 100.00%    | 0                      | 0                       | 664511                  |

| GAN-ICSD   | Training recovery % | Leave out recovery % | New rate % | Training sample number | Leave out sample number | Generated sample number |
|------------|---------------------|----------------------|------------|------------------------|-------------------------|-------------------------|
| Binary     | 78.12%              | 82.71%               | 83.15%     | 5145                   | 561                     | 24511                   |
| Ternary    | 30.41%              | 31.23%               | 98.68%     | 9092                   | 1028                    | 209520                  |
| Quaternary | 3.26%               | 5.19%                | 99.98%     | 2849                   | 308                     | 512598                  |
| Quinary    | 0.00%               | 0.00%                | 100.00%    | 311                    | 36                      | 24511                   |
| Hexavalent | 0.00%               | 0.00%                | 100.00%    | 24                     | 2                       | 209520                  |
| Seven      | 0.00%               | 0.00%                | 100.00%    | 1                      | 0                       | 512598                  |
| Octavalent | 0.00%               | 0.00%                | 100.00%    | 0                      | 0                       | 554790                  |

| GAN-MP     | Training recovery % | Leave out recovery % | New rate % | Training sample number | Leave out sample number | Generated sample number |
|------------|---------------------|----------------------|------------|------------------------|-------------------------|-------------------------|
| Binary     | 84.42%              | 81.92%               | 72.22%     | 8060                   | 874                     | 24385                   |
| Ternary    | 38.94%              | 38.80%               | 95.86%     | 22403                  | 2505                    | 210745                  |
| Quaternary | 14.97%              | 14.14%               | 99.68%     | 10218                  | 1139                    | 480498                  |
| Quinary    | 0.79%               | 0.50%                | 100.00%    | 1772                   | 199                     | 512603                  |
| Hexavalent | 0.00%               | 0.00%                | 100.00%    | 0                      | 0                       | 394067                  |
| Seven      | 0.00%               | 0.00%                | 100.00%    | 0                      | 0                       | 253331                  |
| Octavalent | 0.00%               | 0.00%                | 100.00%    | 0                      | 0                       | 141421                  |

**Supplementary Video 1:** the demo video with the animation of the materials generation process of GAN-ICSD to show how it fills the composition design space of inorganic materials

<https://youtu.be/psneoau1m-8>
